# Supplementary material for: In Vitro Anti-Toxoplasma Activity of Extracts Obtained from Tabebuia rosea and Tabebuia chrysantha: The Role of β-Amyrin
Source: MDPI journal article supplement (doi:10.3390/molecules29050920), 2024-02-20

## Supplementary information Phytochemical analysis

**Table S1.** Preliminary phytochemical analysis of extracts prepared from the inner bark of *T. rosea*

| PHYTOCHEMICAL COMPONENT                 | REAGENT                                           | MEOH | HEX | CHCL <sub>3</sub> | ACET (SUN) | ACET (INS) | BUOH | H <sub>2</sub> O |
|-----------------------------------------|---------------------------------------------------|------|-----|-------------------|------------|------------|------|------------------|
| PHENOLS AND TANNINS                     | FeCl <sub>3</sub> /EtOH                           | +    | -   | ++                | +          | +          | +    | -                |
| FLAVONOIDS                              | AlCl <sub>3</sub> /EtOH                           | +++  | +   | +                 | +++        | +++        | +++  | +                |
| LIGNANS                                 | UV 365 nm                                         | ++   | -   | +                 | ++         | ++         | ++   | +                |
|                                         | Vanillin/EtOH-H <sub>3</sub> PO <sub>4</sub>      | +++  | +++ | +++               | +++        | +++        | +++  | ++               |
| ANTHRONES                               | KOH/EtOH                                          | ++   | -   | -                 | -          | ++         | ++   | ++               |
| ANTHRAQUINONES                          |                                                   | +    | -   | +++               | -          | -          | -    | -                |
| COUMARINS                               |                                                   | ++   | ++  | +++               | +++        | +++        | +++  | +                |
| TERPENES/TERPENOIDS<br>STEROLS/STERIODS | Liebermann-Burchard                               | ++   | +++ | +++               | +++        | +++        | ++   | +                |
|                                         | Vanillin-H <sub>3</sub> PO <sub>4</sub>           | +++  | ++  | +++               | +++        | ++         | ++   | ++               |
|                                         | Anisaldehyde- AcAc-H <sub>2</sub> SO <sub>4</sub> | +    | ++  | ++                | +          | +          | -    | -                |
| IRIDIODS                                | Vanillin-H <sub>2</sub> SO <sub>4</sub>           | ++   | +++ | +++               | +++        | ++         | -    | -                |
| TRITERPENES                             | Anisaldehyde- AcAc-H <sub>2</sub> SO <sub>4</sub> | -    | -   | -                 | -          | -          | -    | -                |
| SAPONINS                                |                                                   | ++   | +   | +++               | ++         | ++         | ++   | -                |
| TRITERPENES AND SAPONINS                | SbCl <sub>3</sub> /MeOH                           | ++   | +++ | +++               | +++        | ++         | ++   | -                |
| SESQUITERPENE LACTONES                  | Oleum                                             | -    | -   | -                 | -          | -          | -    | -                |
| ALDEHYDES AND KETONES                   | DNPH                                              | ++   | ++  | +++               | +          | ++         | ++   | +                |
| UNSATURATED FATTY ACIDS                 | Iodine                                            | +++  | +++ | +++               | +++        | +++        | +++  | ++               |
| ANTIOXIDANT COMPOUNDS                   | DPPH                                              | +++  | +++ | +++               | +++        | +++        | +++  | +++              |

**Table S2.** Preliminary phytochemical analysis of extracts obtained from *T. rosea* leaves

| PHYTOCHEMICAL COMPONENT                 | REAGENT                                          | MEOH | HEX | CHCL <sub>3</sub> | ACET (SUN) | ACET (INS) | BUOH | H <sub>2</sub> O |
|-----------------------------------------|--------------------------------------------------|------|-----|-------------------|------------|------------|------|------------------|
| PHENOLS AND TANNINS                     | FeCl <sub>3</sub> /EtOH                          | ++   | -   | -                 | +++        | +++        | +++  | -                |
| FLAVONOIDS                              | AlCl <sub>3</sub> /EtOH                          | ++   | +   | -                 | +++        | +++        | ++   | +                |
| LIGNANS                                 | UV 365 nm                                        | +    | -   | -                 | ++         | ++         | ++   | +                |
|                                         | Vanillin/EtOH-H <sub>3</sub> PO <sub>4</sub>     | ++   | ++  | ++                | +++        | ++         | ++   | ++               |
| ANTHRONES                               | KOH/EtOH                                         | +++  | +   | ++                | +++        | +++        | +++  | +                |
| ANTHRAQUINONES                          |                                                  | -    | -   | -                 | -          | -          | -    | -                |
| COUMARINS                               |                                                  | +    | +   | -                 | +++        | ++         | ++   | +                |
| TERPENES/TERPENOIDS<br>STEROLS/STEROIDS | Liebermann-Burchard                              | +++  | +++ | +++               | +++        | ++         | +++  | +                |
|                                         | Vanillin-H <sub>3</sub> PO <sub>4</sub>          | +++  | +++ | +++               | +++        | +++        | +++  | -                |
| IRIDOIDS                                | Anisaldehyde-AcAc-H <sub>2</sub> SO <sub>4</sub> | +++  | +++ | +++               | ++         | -          | -    | -                |
|                                         | Vanillin-H <sub>2</sub> SO <sub>4</sub>          | +++  | +++ | +++               | +++        | -          | ++   | -                |
| TRITERPENES                             | Anisaldehyde-AcAc-H <sub>2</sub> SO <sub>4</sub> | ++   | +++ | +++               | +          | -          | -    | -                |
| SAPONINS                                |                                                  | +++  | +++ | +++               | ++         | ++         | ++   | -                |
| TRITERPENES AND SAPONINS                | SbCl <sub>3</sub> /MeOH                          | +++  | +   | ++                | +++        | +++        | +++  | -                |
| SESQUITERPENE LACTONES                  | Oleum                                            | -    | -   | -                 | -          | -          | -    | -                |
| ALDEHYDES AND KETONES                   | DNPH                                             | ++   | +++ | ++                | +++        | ++         | ++   | +                |
| UNSATURATED FATTY ACIDS                 | Iodine                                           | ++   | +++ | +++               | +++        | ++         | +++  | ++               |
| ANTIOXIDANT COMPOUNDS                   | DPPH                                             | +++  | +++ | +                 | +++        | +++        | +++  | ++               |

**Table S3.** Preliminary phytochemical analysis of extracts prepared from the inner bark of *T. chrysantha*.

| PHYTOCHEMICAL COMPONENT                 | REAGENT                                          | MEOH | HEX     | CHCL <sub>3</sub> | ACET (SUN) | ACET (INS) | BUOH | H <sub>2</sub> O |
|-----------------------------------------|--------------------------------------------------|------|---------|-------------------|------------|------------|------|------------------|
| PHENOLS AND TANNINS                     | FeCl <sub>3</sub> /EtOH                          | ++   | +       | +                 | +++        | +++        | +++  | -                |
| FLAVONOIDS                              | AlCl <sub>3</sub> /EtOH                          | ++   | +       | ++                | +++        | +++        | +++  | -                |
| LIGNANS                                 | UV 365 nm                                        | ++   | -       | +                 | +++        | ++         | ++   | -                |
|                                         | Vanillin/EtOH-H <sub>3</sub> PO <sub>4</sub>     | +++  | +       | +                 | ++         | ++         | ++   | ++               |
| ANTHRONES                               | KOH/EtOH                                         | ++   | +       | -                 | +++        | +++        | +++  | -                |
| ANTHRAQUINONES                          |                                                  | +    | ++      | +++               | -          | -          | -    | -                |
| COUMARINS                               |                                                  | ++   | +       | ++                | ++         | ++         | ++   | +                |
| TERPENES/TERPENOIDS<br>STEROLS/STERIODS | Liebermann-Burchard                              | +++  | ++<br>+ | +++               | +++        | +++        | +++  | ++               |
|                                         | Vanillin-H <sub>3</sub> PO <sub>4</sub>          | ++   | ++<br>+ | +++               | +++        | +++        | +++  | ++               |
| IRIDOIDS                                | Anisaldehyde-AcAc-H <sub>2</sub> SO <sub>4</sub> | ++   | ++<br>+ | +++               | +++        | -          | -    | -                |
|                                         | Vanillin-H <sub>2</sub> SO <sub>4</sub>          | +++  | ++<br>+ | +++               | +++        | +++        | +++  | +                |
| TRITERPENES                             | Anisaldehyde-AcAc-H <sub>2</sub> SO <sub>4</sub> | ++   | ++<br>+ | +++               | ++         | -          | -    | -                |
| SAPONINS                                |                                                  | ++   | ++<br>+ | ++                | ++         | -          | -    | -                |
| TRITERPENES AND SAPONINS                | SbCl <sub>3</sub> /MeOH                          | +    | ++<br>+ | +++               | ++         | ++         | ++   | +                |
| SESQUITERPENE LACTONES                  | Oleum                                            | -    | -       | -                 | -          | -          | -    | -                |
| ALDEHYDES AND KETONES                   | DNPH                                             | ++   | ++<br>+ | +++               | ++         | ++         | ++   | -                |
| UNSATURATED FATTY ACIDS                 | Iodine                                           | +++  | ++<br>+ | +++               | +++        | +++        | +++  | ++               |
| ANTIOXIDANT COMPOUNDS                   | DPPH                                             | +++  | ++<br>+ | +++               | +++        | +++        | +++  | +++              |

**Table S4.** Preliminary phytochemical analysis of extracts prepared from leaves of *T. chrysantha*.

| Phytochemical Core      | Reagent                                           | MeOH | CHCl3 | AcEt | Buoh | H <sub>2</sub> O |
|-------------------------|---------------------------------------------------|------|-------|------|------|------------------|
| Phenols and Tannins     | FeCl <sub>3</sub> /EtOH                           | ++   | -     | +++  | +++  | -                |
| Flavonoids              | AlCl <sub>3</sub> /EtOH                           | +++  | -     | +++  | +++  | ++               |
| Lignans                 | UV 365 nm                                         | +++  | +     | +++  | +++  | ++               |
|                         | Vanillin/EtOH-H <sub>3</sub> PO <sub>4</sub>      | +++  | +     | +++  | +++  | ++               |
| Anthrones               | KOH/EtOH                                          | ++   | +     | +++  | +++  | ++               |
| Anthraquinones          |                                                   | -    | -     | +    | -    | -                |
| Coumarins               |                                                   | +    | +     | +    | ++   | +                |
| Terpenes/Terpenoids     | Liebermann-Burchard                               | +++  | +++   | ++   | ++   | ++               |
|                         | Vanillin-H <sub>3</sub> PO <sub>4</sub>           | ++   | +++   | +++  | +++  | ++               |
| Sterols/Steroids        | Anisaldehyde- AcAc-H <sub>2</sub> SO <sub>4</sub> | +++  | +++   | ++   | -    | -                |
|                         |                                                   | +++  | +++   | +    | +    | -                |
| Iridoids                | Vanillin-H <sub>2</sub> SO <sub>4</sub>           | +++  | +++   | +    | +    | -                |
| Triterpenes             | Anisaldehyde- AcAc-H <sub>2</sub> SO <sub>4</sub> | +++  | +++   | +    | -    | -                |
| Saponins                |                                                   | +++  | +++   | ++   | ++   | +                |
| Triterpenes             | SbCl <sub>3</sub> /MeOH                           | ++   | ++    | ++   | ++   | +                |
| Saponins                |                                                   | ++   | ++    | ++   | ++   | +                |
| Sesquiterpene Lactones  | Oleum                                             | -    | -     | -    | -    | -                |
| Aldehydes and Ketones   | DNPH                                              | +    | -     | +++  | ++   | ++               |
| Unsaturated Fatty Acids | Iodine                                            | +++  | +++   | +++  | +++  | +++              |
| Antioxidant compounds   | DPPH                                              | +++  | ++    | +++  | +++  | +++              |

## Supplementary information $\beta$ -amyrin spectra

### RMN- $^1\text{H}$ $\beta$ -amirin

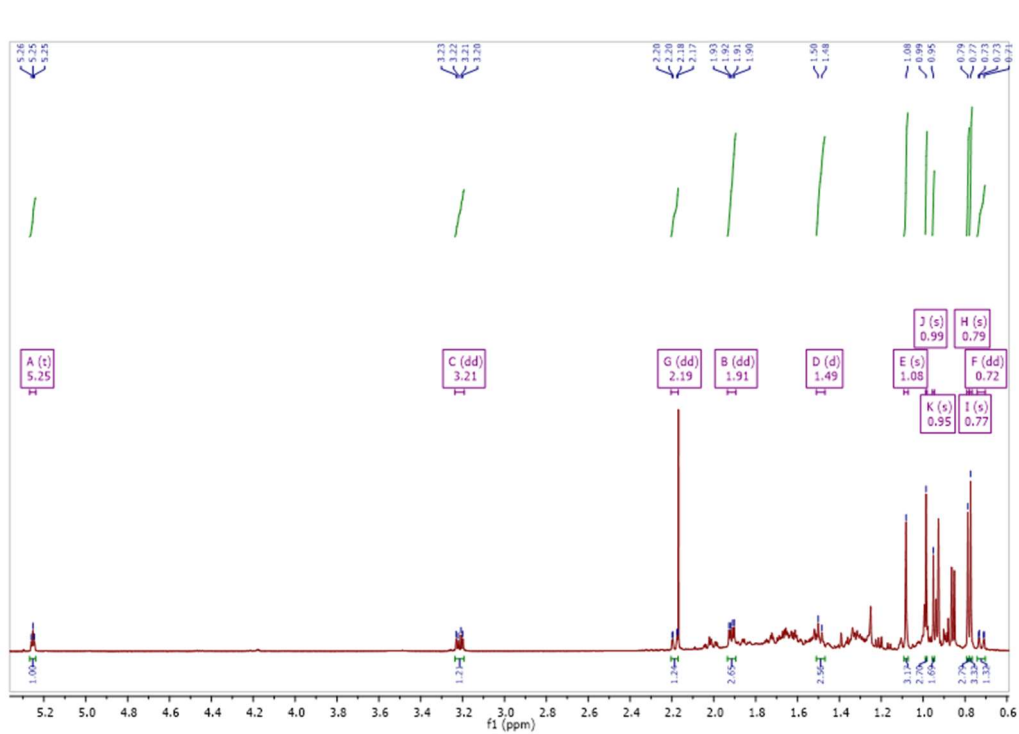

# RMN-<sup>13</sup>C β-amirin

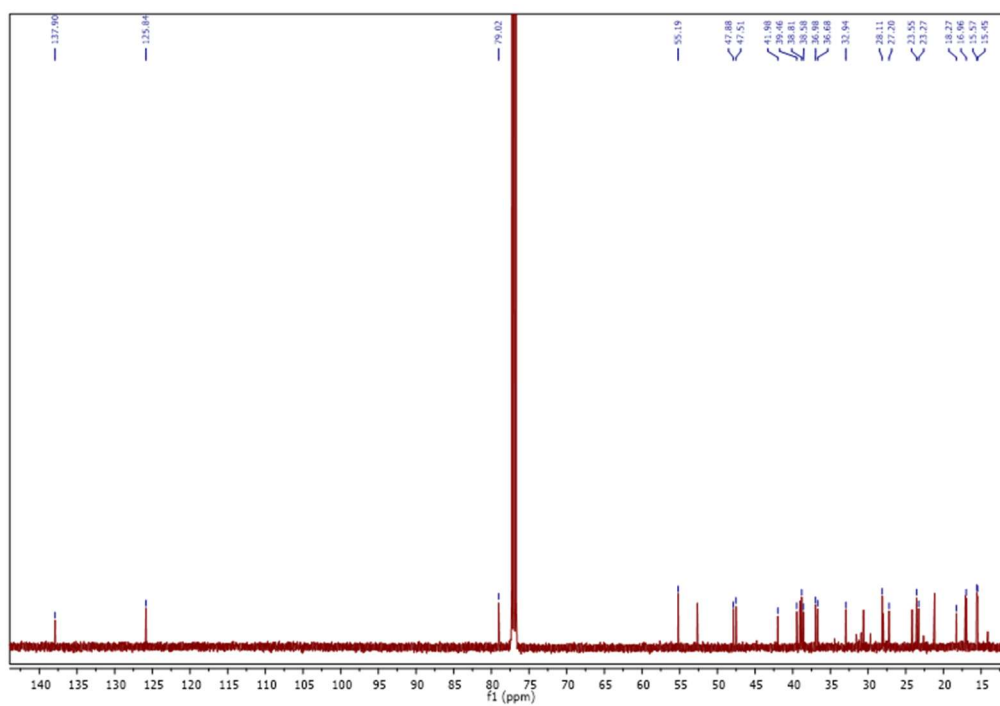

**COSY  $\beta$ -amirin**

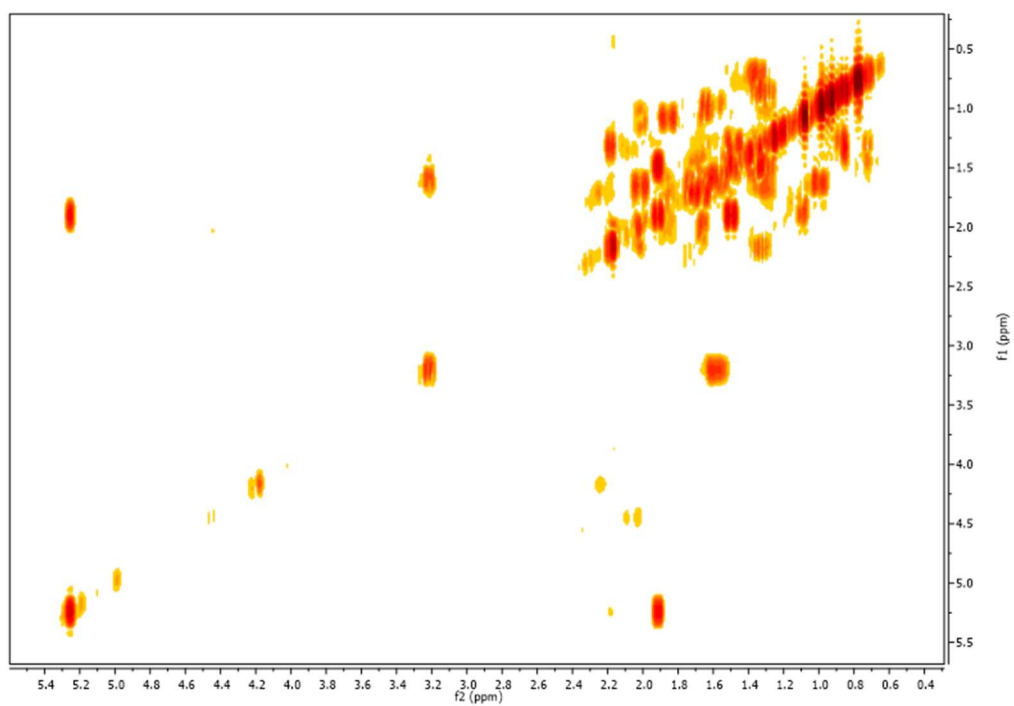

# HSQC $\beta$ -amirin

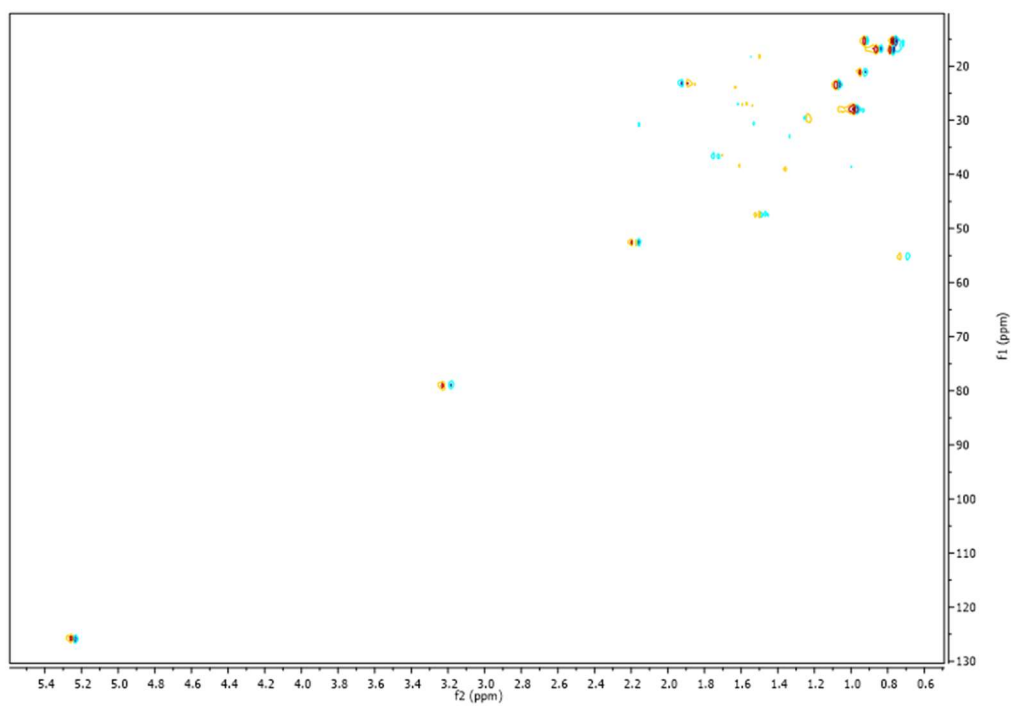



# HMBC $\beta$ -amirin

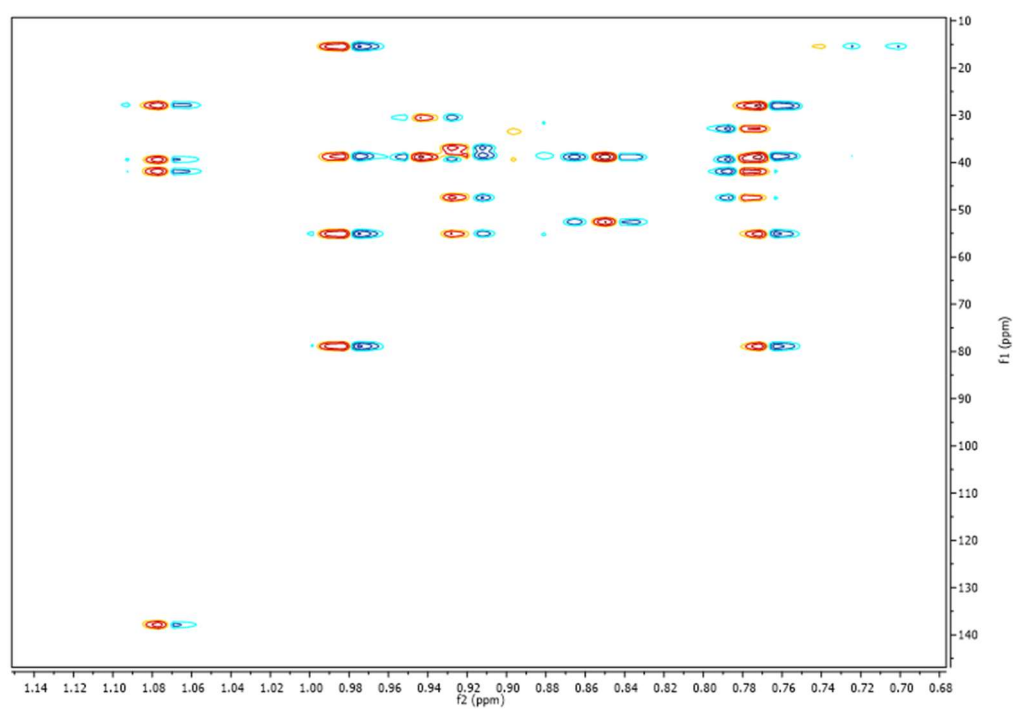

Supplement: s1 [file s1]
